# Supplementary material for: Efficacy of acupuncture in improving ovarian function in patients with Poor Ovarian Response: study protocol for a randomized clinical trial
Source: Research Square preprint supplement (doi:10.21203/rs.3.rs-4617003/v1), 2024-09-18
Supplement: Supplementary file 1 [file 89d2044fd592042b4af82a8a.doc]

| **Section/topic** | **#** | **Checklist item** | **Information reported** | |
| --- | --- | --- | --- | --- |
| **Yes** | **No** |
| **ADMINISTRATIVE INFORMATION** | | | | |
| Title | | | | |
| Identification | 1a | Identify the report as a protocol of a study protocal | √ |  |
| Update | 1a | If the protocol is for an update of a previous study protocal, identify as such |  | √ |
| Registration | 2 | If registered, provide the name of the registry (e.g., PROSPERO) and registration number in the Abstract | √ |  |
| Authors # | | | | |
| Contact | 3a | Provide name, institutional affiliation, and e-mail address of all protocol authors; provide physical mailing address of corresponding author | √ |  |
| Contributions | 3b | Describe contributions of protocol authors and identify the guarantor of the review | √ |  |
| Amendments | 4 | If the protocol represents an amendment of a previously completed or published protocol, identify as such and list changes; otherwise, state plan for documenting important protocol amendments |  | √ |
| Support | | | | |
| Sources | 5a | Indicate sources of financial or other support for the protocal | √ |  |
| Sponsor | 5b | Provide name for the review funder and/or sponsor | √ |  |
| Role of sponsor/funder | 5b | Describe roles of funder(s), sponsor(s), and/or institution(s), if any, in developing the protocol | √ |  |
| **INTRODUCTION** | | | | |
| Background and rationale | 6 | Describe the backgroud and rationale about Poor Ovarian Response for the review in the context of what is already known | **√** |  |
| Objective | 7 | The objective of this study was to evaluate the clinical efficacy of acupuncture in improving ovarian function in patients with Poor Ovarian Response | **√** |  |
| Trial design | 8 | This was a randomised parallel controlled trial with one test group and two control groups | **√** |  |
| **METHODS AND ANALYSIS** | | | | |
| Eligibility | 9 | The diagnostic criteria,inclusion criteria,exclusion criteria are described and patients will be recruited strictly according to these criterias | **√** |  |
| Intervention | 10 | Patients in all three groups were treated with controlled ovarian stimulation , in addition to which group A received 24 sessions of true acupuncture and group B received 24 sessions of non-meridian and non-acupoint placebo acupuncture | **√** |  |
| Participant’s timeline | 11 | Venous blood and sinus follicle ultrasound monitoring were taken on the second day of menstruation and the second day of the controlled ovarian stimulation cycle in the month of enrolment in the three groups, and venous blood and follicular fluid were taken and retained on the day of egg retrieval; stool samples were retained on the day of enrolment and on the day before egg retrieval | **√** |  |
| **STUDY RECORDS** | | | | |
| randomization | 12 | Describe the mechanism of random allocation concealment | **√** |  |
| Outcomes | 13 | List and define all outcomes for which data will be sought | **√** |  |
| Research quality control | 14 | Evaluate the operating procedures and safety of the experiment | **√** |  |
| Recruitment | 15 | Describe the recruitment location and recruitment schedule for the experiment | **√** |  |
| Participating centres | 16 | Describe that this experiment was conducted in four centers | **√** |  |
| **STATISTICAL METHODS** | | | | |
| Data analysis | 17a | Describes the statistical methods required for count data and measured data | **√** |  |
| Data confidentiality measures | 17 | Describe the data collection, confidentiality, storage and monitoring of the study documents | **√** |  |
| Data managemen | 17 | Describe the mechanism(s) that will be used to manage records and data throughout the protocal | **√** |  |
| **Ethical and Ethical Approval** | | | | |
| Ethics and dissemination | 18 | To spread through various ethical and moral means | **√** |  |
| Research ethics approval | 18 | Clinical registration and ethical approval have been obtained | **√** |  |
| Consent | 18 | Each enrolled patient voluntarily signed an informed consent form | **√** |  |
